# Supplementary material
Source: HighWire-hosted journal article supplement (https://erj.ersjournals.com/content/61/1/2201972)
Supplement: inline-supplementary-material-1 [file inline-supplementary-material-1.pdf]

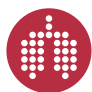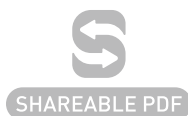

# Sotatercept for pulmonary arterial hypertension: something old and something new

Lewis J. Rubin<sup>1</sup> and Robert Naeije<sup>2</sup>

<sup>1</sup>University of California San Diego School of Medicine, San Diego, CA, USA. <sup>2</sup>Free University of Brussels, Brussels, Belgium.

Corresponding author: Lewis J. Rubin ([ljr@lewisrubinmd.com](mailto:ljr@lewisrubinmd.com))

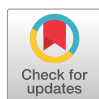

Shareable abstract (@ERSpublications)

**Sotatercept is a drug that targets a novel pathogenic pathway in pulmonary arterial hypertension and has the potential to be an effective new therapy for this condition** <https://bit.ly/3s1tQb1>

**Cite this article as:** Rubin LJ, Naeije R. Sotatercept for pulmonary arterial hypertension: something old and something new. *Eur Respir J* 2023; 61: 2201972 [DOI: 10.1183/13993003.01972-2022].

This single-page version can be shared freely online.

Copyright ©The authors 2023.  
For reproduction rights and  
permissions contact  
[permissions@ersnet.org](mailto:permissions@ersnet.org)

Received: 12 Oct 2022  
Accepted: 13 Oct 2022

HUMBERT *et al.* [1] report safety and efficacy results from the long-term open-label extension study of the phase 2 PULSAR placebo-controlled, randomised trial of sotatercept in pulmonary arterial hypertension (PAH) in this issue of the *European Respiratory Journal*. Subjects who had completed the phase 2, 24-week randomised trial were eligible for participation, with ex-placebo subjects re-randomised to receive sotatercept in doses of either 0.3 or 0.7 mg·kg<sup>-1</sup>, while ex-sotatercept subjects remained on their earlier randomised dose. Of the 106 subjects completing the 24-week PULSAR trial [2], 97 enrolled in the extension study, of whom 30 had received placebo. These patients had moderately severe disease, as reflected by their background use of PAH-targeted therapies: over half were already receiving triple therapy, 36% were receiving double therapy, and over one-third were receiving a parenteral prostacyclin agonist as part of their treatment regimen. Over one-half of subjects had idiopathic PAH, while fewer than 20% had connective tissue disease as the aetiology of PAH. This study population reflects a cohort in need of additional therapy at a time when few other options exist, although it is heavily weighted towards subjects with idiopathic PAH, who tend to have better responses to therapy than those with connective tissue disease.
